# Supplementary material for: Lanthanoid-doped BiVO4 microswimmers with built-in photon upconversion and light-driven motion
Source: Royal Society of Chemistry journal article supplement (doi:10.1039/d5cc02091c), 2025-01-01
Supplement: d5cc02091c1.pdf [file d5cc02091c1.pdf]

## Supporting Information

### **Lanthanoid-doped BiVO<sub>4</sub> microswimmers with Built-In Photon Upconversion and Light-Driven Motion**

João Marcos Gonçalves,<sup>a</sup> Luisa Natalia Cordoba Urresti,<sup>a,b</sup> Yufen Chen <sup>a</sup> and Katherine Villa <sup>a\*</sup>

a. Institute of Chemical Research of Catalonia (ICIQ), The Barcelona Institute of Science and Technology (BIST), Av. Països Catalans, 16, Tarragona E-43007, Spain.

b. Departament de Química Física i Inorgànica, Universitat Rovira i Virgili, 43007 Tarragona, Spain

\*kvilla@iciq.es

## Materials

Rare earth oxides ( $\text{Y}_2\text{O}_3$ ,  $\text{Yb}_2\text{O}_3$  and  $\text{Er}_2\text{O}_3$ , 99.9%) were purchased from ABCR GmbH (Germany), and dissolved in  $\text{HNO}_3$  (65%, Chem-Lab, Belgium) to obtain their respective nitrates. All other reagents were used without further modification. Bismuth nitrate pentahydrate ( $\text{Bi}(\text{NO}_3)_3 \cdot 5\text{H}_2\text{O}$ , 99.999%), sodium metavanadate ( $\text{NaVO}_3$ , anhydrous, 99.9%) were purchased from Sigma Aldrich (USA). Potassium chloride was purchased from PanReac Química (Spain). Ethanolamine was purchased from Glentham Life Sciences (UK). Hydroquinone (99.5%) was purchased from Thermo Scientific (USA), and benzoquinone (reagent grade  $\geq 98\%$ ) was purchased from Sigma Aldrich (USA).

## Methods

### *Synthesis of pristine and Yb,Er-doped $\text{BiVO}_4$ microswimmers*

The synthesis of the pristine star-shaped-  $\text{BiVO}_4$  MSs was previously described by Meng <sup>1,2</sup>. First,  $\text{Bi}(\text{NO}_3)_3$  (1 mmol) was dissolved in 30 mL of  $\text{H}_2\text{O}$ , forming a cloudy white suspension. Then, KCl (3 mmol) was added and stirred for 5 minutes, followed by addition of  $\text{NaVO}_3$  (1 mmol), when the color changed to orange. The pH was adjusted to 2.0 with ethanolamine, and this suspension was stirred for 1 h (37 kHz, 580 W) and then ultrasonicated for an additional hour. Finally, the dispersion was transferred to a 50 mL Teflon flask, and subjected to hydrothermal treatment at 160 °C for 12 hours. The obtained material was filtered, washed with water and ethanol and dried at 70 °C overnight.

The doping was achieved only by adjusting the stoichiometric amounts of  $\text{Bi}(\text{NO}_3)_3$ ,  $\text{Yb}(\text{NO}_3)_3$  and  $\text{Er}(\text{NO}_3)_3$  solutions. The calculated yields for all samples are given in Table S3.

### *Characterization of the as-synthesized $\text{BiVO}_4$ -based microswimmers*

Field emission scanning electron microscopy (FESEM) was performed in a Scios 2 (FEI), using a focus Ga ion beam. Electronic Scanning Electron Microscopy (ESEM) and energy dispersive X-ray spectroscopy (EDS) mapping were performed in a Quanta 600 microscope (FEI). Samples were dispersed in ethanol and deposited in silicon wafers. X-Ray diffraction (XRD) was performed in a D8-DISCOVER (Bruker) from 5 to 80 ° at a 10 °·minute<sup>-1</sup> scan speed. A UV-2401PC spectrophotometer (Shimadzu) equipped with an integrating sphere was utilized for diffuse reflectance.

Emission spectra were recorded using an OmniFluo 900 spectrofluorimeter (Zolix) using a 980 nm laser as excitation source (CNI Lasers) equipped with a collimator with a 1 mm beam diameter at 5 cm distance (maximum power density = 66.2 W·cm<sup>-2</sup>). For fluorescence imaging and motion analysis, a THUNDER Imager DMI8 inverted microscope was used (Leica) using 40x or 100x objectives. Videos were recorded in time-lapse mode at 29 frames per second (FPS), and the microswimmers were tracked for 25 seconds using a freshly prepared mixture of hydroquinone and benzoquinone at a final concentration of 10 mM:5mM proportion. The excitation was performed with a 475 nm LED passing through the objective, giving a power density of 5 W·cm<sup>-2</sup> for the 40x objective (used only for the pristine MS) and 4 W·cm<sup>-2</sup> for the 100x objective.

### *Degradation of Rhodamine 6G*

A solution of 10 ppm of Rhodamine 6G was used for the degradation experiments. A suspension of 5 mg of the microswimmers was prepared in 10 mL of this solution and H<sub>2</sub>O<sub>2</sub> (30% v/v) was added to a final concentration of 1%.

Photocatalytic degradation was performed illuminating this suspension with a 300 W Xenon light source (ASAHI Spectra) with a 400 nm long pass filter. Spectra were recorded in a UV-1800 spectrophotometer (Shimadzu).

### **Propulsion mechanism**

Asymmetric generation of chemical species is essential for achieving self-propulsion in microswimmers. For the lanthanoid-doped BiVO<sub>4</sub> MSs, this asymmetry is likely enhanced by the surface irregularities and heterogeneous roughness, clearly visible in Figure 1.

The propulsion mechanism is most plausibly attributed to self-diffusiophoresis. Upon visible light irradiation, BiVO<sub>4</sub> absorbs photons and generates e<sup>-</sup>-h<sup>+</sup> pairs, which subsequently react with HQ/BQ redox couple according to the following equations <sup>3,4</sup>:

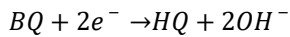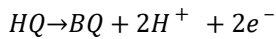

Due to the differing diffusion rates of the generated ions ( $D_{H^{+}} = 9.311 \cdot 10^{-5} \text{ cm}^2\text{s}^{-1}$  and  $D_{OH^{-}} = 5.273 \cdot 10^{-5} \text{ cm}^2\text{s}^{-1}$ ), a local chemical gradient and an associated electric field are established near the particle surface, which drives the motion via phoretic mechanisms.<sup>5</sup>

Table S1. Semi-quantitative XRD analysis showing the phase composition of each microswimmer sample

| % of Er <sup>3+</sup> | Monoclinic | Tetragonal | ErVO <sub>4</sub> |
|-----------------------|------------|------------|-------------------|
| 0                     | 100%       | 0%         | 0%                |
| 15                    | 773.%      | 3.1%       | 19.6%             |
| 18                    | 50.2%      | 31.9%      | 17.9%             |
| 20                    | 12.2%      | 57.1%      | 30.7%             |

Table S2. Performance comparison of BiVO<sub>4</sub>-based microswimmers under visible light excitation.

| Microswimmer                       | Fuel                               | Excitation                                          | Speed<br>(bodylength·s <sup>-1</sup> ) | Reference    |
|------------------------------------|------------------------------------|-----------------------------------------------------|----------------------------------------|--------------|
| Four-point star- BiVO <sub>4</sub> | 0.1% H <sub>2</sub> O <sub>2</sub> | Commercial light in visible region (with UV filter) | ≈0.83                                  | <sup>6</sup> |
| Four-point star- BiVO <sub>4</sub> | 1% H <sub>2</sub> O <sub>2</sub>   | 469 nm                                              | 1.92                                   | <sup>7</sup> |
| Butterfly-shaped BiVO <sub>4</sub> | p-nitrophenol                      | Commercial light in visible region (with UV filter) | 0.38                                   | <sup>8</sup> |
| Spheroidal BiVO <sub>4</sub>       | 0.3% H <sub>2</sub> O <sub>2</sub> | 469 nm                                              | 2.01                                   | <sup>9</sup> |
| Pristine BiVO <sub>4</sub> stars   | HQ/BQ                              | 475 nm                                              | 0.38                                   | This work    |
| BiVO <sub>4</sub> :20%Yb,15%Er     | HQ/BQ                              | 475 nm                                              | 0.22                                   | This work    |
| BiVO <sub>4</sub> :20%Yb,18%Er     | HQ/BQ                              | 475 nm                                              | 0.85                                   | This work    |

Table S3. Yield of BiVO<sub>4</sub>-based microswimmers with varying Er<sup>3+</sup> doping levels.

| Sample   | Theoretical mass (mg) | Experimental mass (mg) | Yield (%) |
|----------|-----------------------|------------------------|-----------|
| Pristine | 324.0                 | 292.6                  | 90.3      |
| 15% Er   | 310.5                 | 209.6                  | 67.5      |
| 18% Er   | 309.2                 | 262.5                  | 84.9      |
| 20% Er   | 308.4                 | 267.8                  | 86.9      |

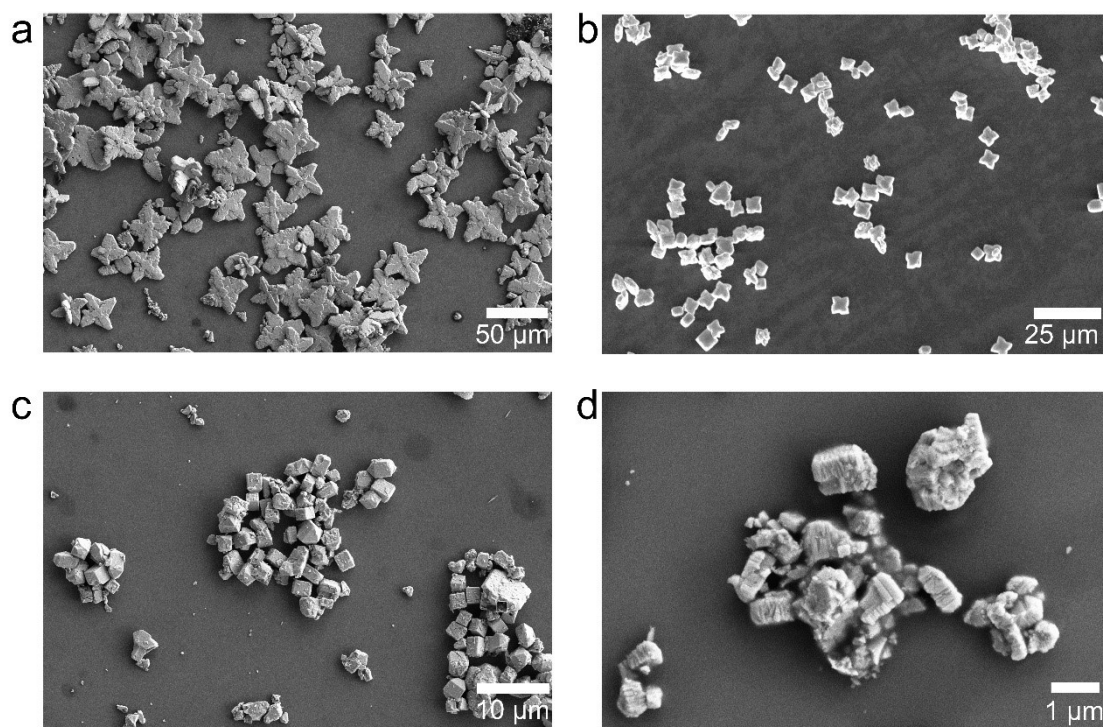

Fig. S1. Low magnification FESEM images of (a) pristine BiVO<sub>4</sub>, (b) 15%Er, (c) 18%Er and (d) 20%Er.

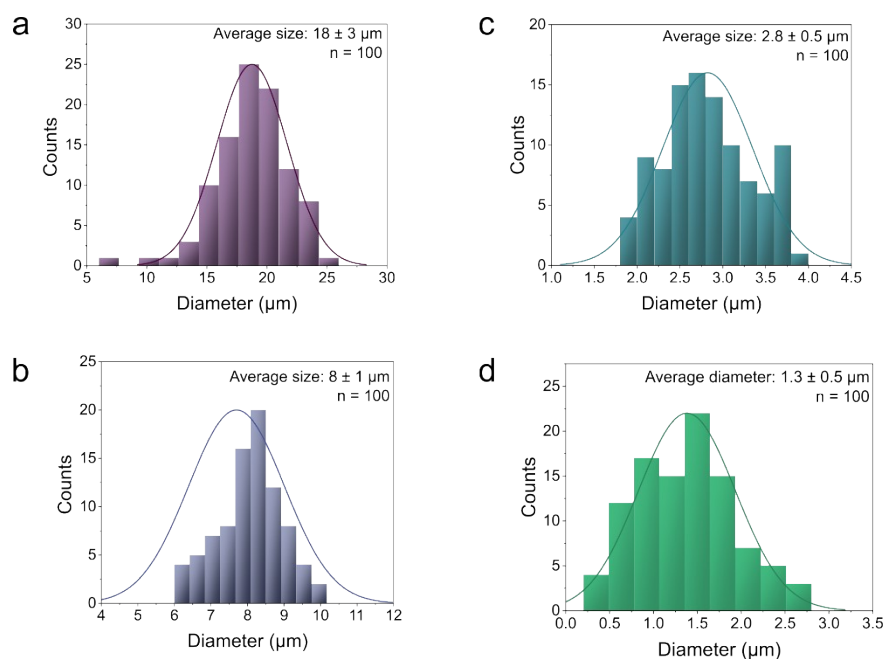

Fig. S2. Size distribution of (a) pristine  $\text{BiVO}_4$ , (b)  $15\%\text{Er}^{3+}$ , (c)  $18\%\text{Er}^{3+}$  and (d)  $20\%\text{Er}^{3+}$ .

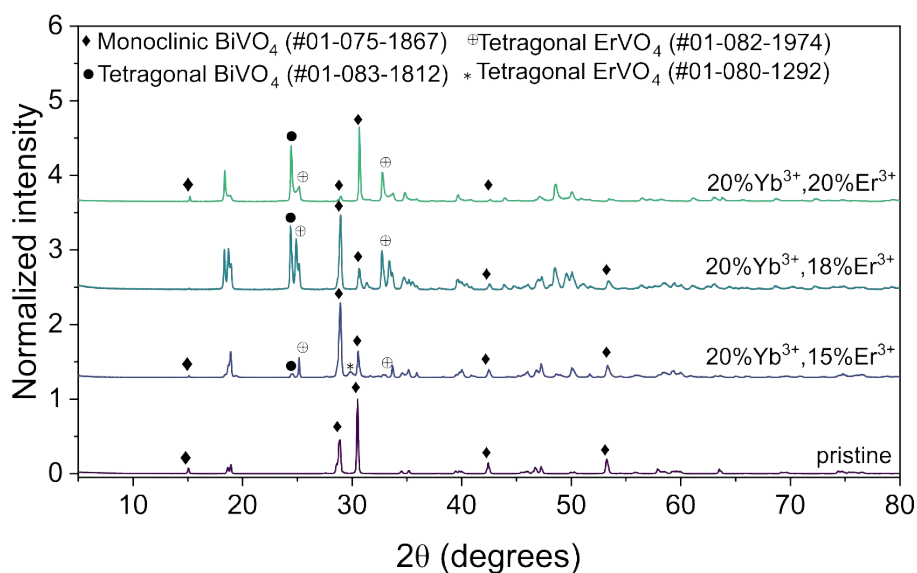

Fig. S3. XRD of the MSs, highlighting some peaks from crystalline phases present.

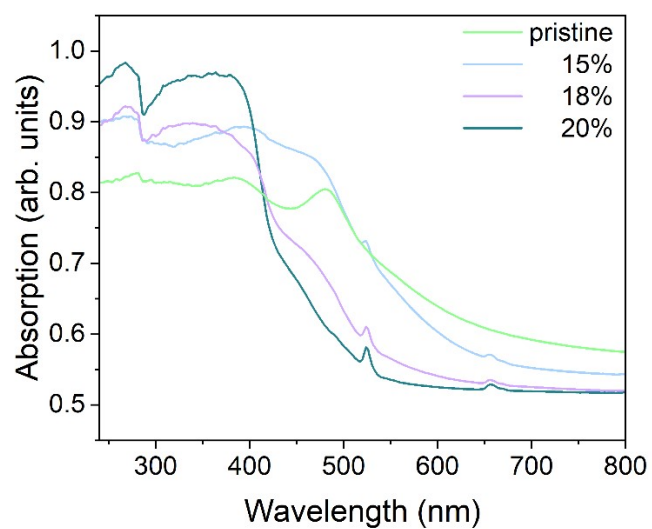

Fig. S4. Absorption spectra of the MSs showing absorption bands attributed to  $\text{Er}^{3+}$ .

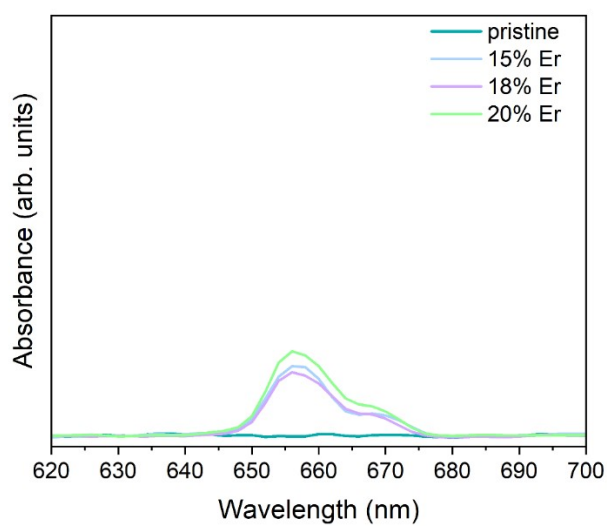

Fig. S5. Baseline corrected absorption spectra of the MSs highlighting  ${}^4\text{F}_{9/2} \leftarrow {}^4\text{I}_{15/2}$  transition from  $\text{Er}^{3+}$ .

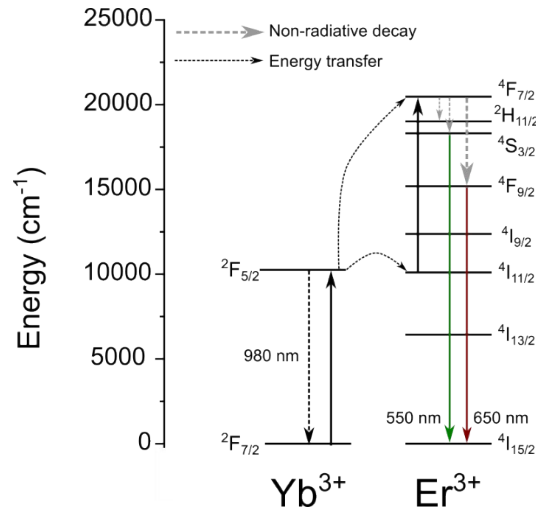

Fig. S6. Energy level diagram illustrating the so-called Energy transfer upconversion (ETU) mechanism for  $\text{Yb}^{3+}$ - $\text{Er}^{3+}$  doped materials.

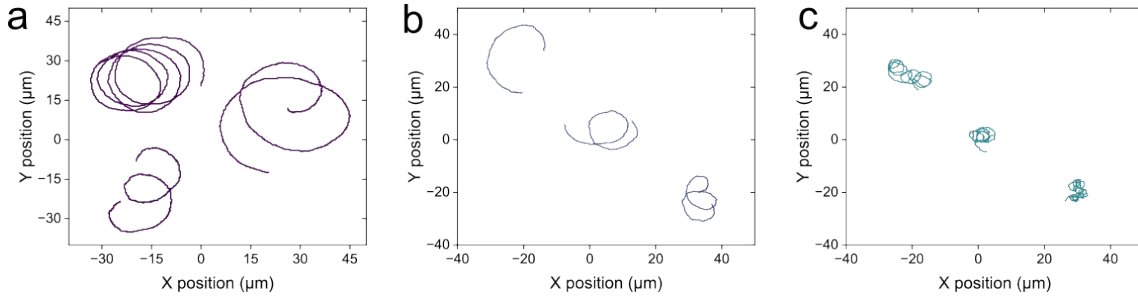

Fig. S7. Representative trajectories of the MSs under 475 nm illumination. (a) pristine (power density =  $5 \text{ W}\cdot\text{cm}^{-2}$ ), (b) 15%Er (power density =  $4 \text{ W}\cdot\text{cm}^{-2}$ ) and (c) 18%Er (power density =  $4 \text{ W}\cdot\text{cm}^{-2}$ ).



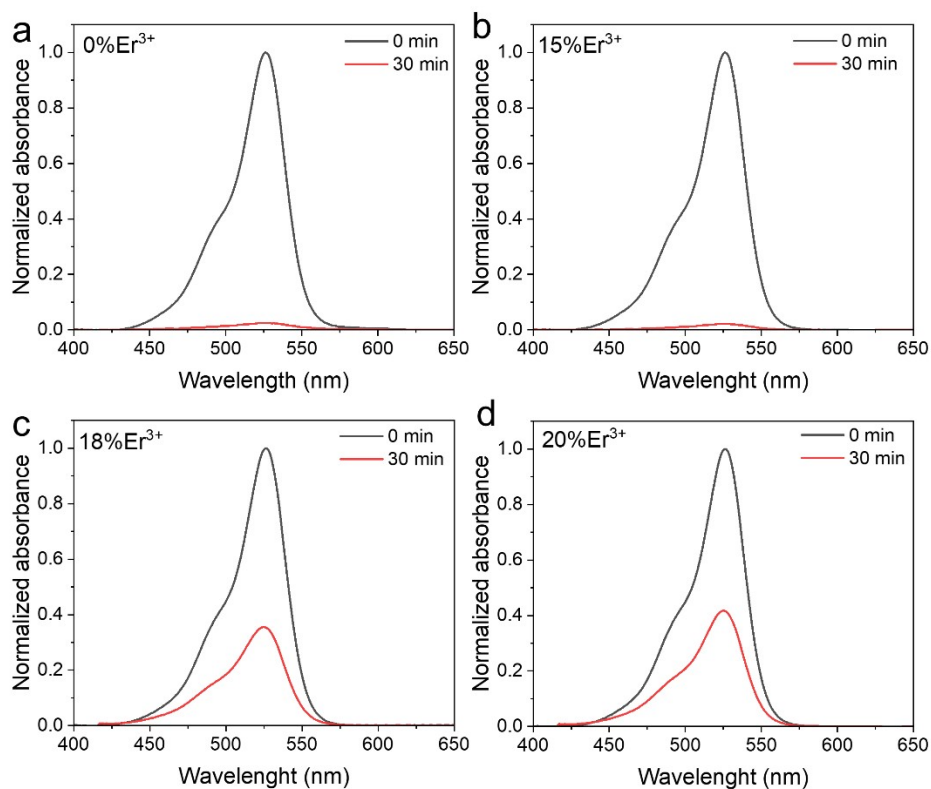

Fig. S8. Normalized absorption spectra of the degradation of Rhodamine 6G by the MSs in 1%  $\text{H}_2\text{O}_2$  after 30 minutes. (a) pristine, (b) 15% $\text{Er}^{3+}$ , (c) 18% $\text{Er}^{3+}$  and (d) 20% $\text{Er}^{3+}$ .

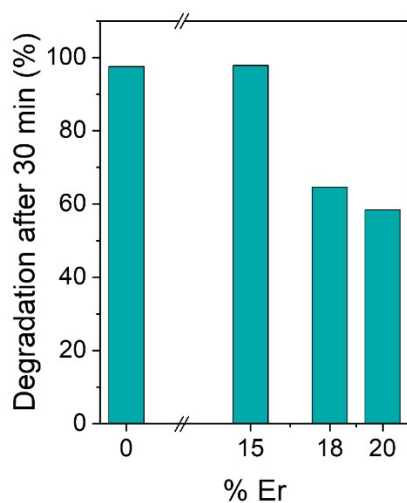

Fig. S9. Rhodamine 6G degradation percentage after 30 minutes of light exposition of the MSs in 1% of  $\text{H}_2\text{O}_2$ .

## References

- 1 S. Meng, T. Ogawa, H. Okumura and K. N. Ishihara, *J. Solid State Chem.*, 2021, **302**, 122291.
- 2 S. Meng, T. Ogawa, K. N. Ishihara and H. Okumura, *Energies*, 2023, **16**, 629.

- 3 B. Dai, J. Wang, Z. Xiong, X. Zhan, W. Dai, C. C. Li, S. P. Feng and J. Tang, *Nat. Nanotechnol.*, 2016, **11**, 1087–1092.
- 4 M. Cheng, X. Yang, F. Zhang, J. Zhao and L. Sun, *Angew. Chem. Int. Ed.*, 2012, **51**, 9896–9899.
- 5 D. Kagan, S. Balasubramanian and J. Wang, *Angew. Chem. Int. Ed.*, 2011, **50**, 503–506.
- 6 K. Villa, F. Novotný, J. Zelenka, M. P. Browne, T. Ruml and M. Pumera, *ACS Nano*, 2019, **13**, 8135–8145.
- 7 S. Heckel and J. Simmchen, *Adv. Intell. Syst.*, 2019, **1**, 1900093.
- 8 X. Yuan, R. Ferrer-Campos, F. A. Garcés-Pineda and K. Villa, *Small*, 2023, **19**, 2207303.
- 9 S. Heckel, J. Grauer, M. Semmler, T. Gemming, H. Löwen, B. Liebchen and J. Simmchen, *Langmuir*, 2020, **36**, 12473–12480.
